# Supplementary material
Source: publisher figshare collection journal article supplement (https://acs.figshare.com/ndownloader/files/11447846)
Supplement: Supplementary file 1 [file 11447846]

**Size-dependent synthesis of gold nanoparticles and its peroxidase-like activity for the colorimetric detection of glutathione from human blood serum**

**Vijay Kumar<sup>1</sup>, Daraksha Bano<sup>1</sup>, Devendra K. Singh<sup>1</sup>, Sweta Mohan<sup>1</sup>, Vikas Kumar Singh<sup>1</sup>  
Syed Hadi Hasan<sup>1\*</sup>**

<sup>1</sup>Nano Material Research Laboratory, Department of Chemistry, Indian Institute of Technology (BHU), Varanasi -221005, U.P., India.

**\*Corresponding author's details:**

E-mail; [shhasan.apc@itbhu.ac.in](mailto:shhasan.apc@itbhu.ac.in), [vijuevs@gmail.com](mailto:vijuevs@gmail.com)

Phone No.: +91-542-6702861

Mobile No.: +91 9839089919

## Preparation of leaf extract

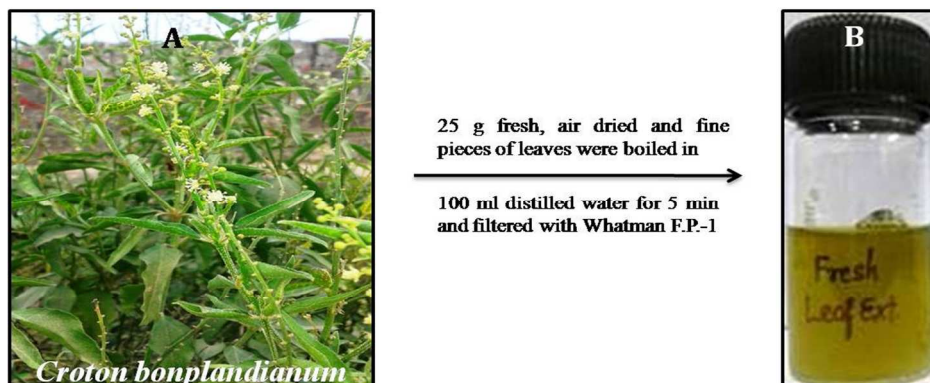

**Scheme Supporting Information 1.** (A) *Croton bonplandinum* plant (B) Aqueous extract of *Croton bonplandinum* (AEC)

## Confirmation and quantification of polyphenolic

### Ferric chloride Test

The presence of polyphenolic compound was confirmed by performing Ferric Chloride test. For this 0.1%  $\text{FeCl}_3$  solution was added into the AEC which resulted into a sudden color change from light yellow to dark green color. This change in color confirmed the presence of polyphenolic compound.

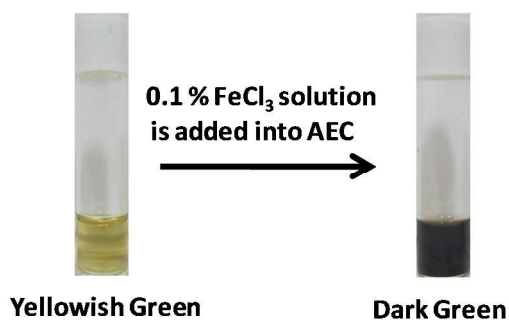

**Scheme Supporting Information 2.** Scheme showing the change in color from light yellow to dark green which confirmed the presence of polyphenolics in AEC

## Folin Ciocalteu's Method

Total phenolics content was estimated by Folin Ciocalteu's method. For this, 1 mL of plant extracts or standard solution of prepared gallic acid (GE) (100, 200, 400, 600, 800, 1000 µg/mL) was added in test tube. Thereafter, 1 mL of Folin Ciocalteu's reagent (1N) was added to the above reaction mixture and shaken. After 5 minutes, 1.0 mL of 7 % Na<sub>2</sub>CO<sub>3</sub> was added to the mixture, shaken and the total volume was made up to 10 mL with distilled water. After 90 min, the absorbance was determined against reagent blank at 650 nm using UV visible spectrophotometer. The experiments were performed in triplicates. The total phenolics content was expressed as mg Gallic acid Equivalents (GAE). The result showed that AEC was the rich source of phenolics (2.89 mg GAE/g).

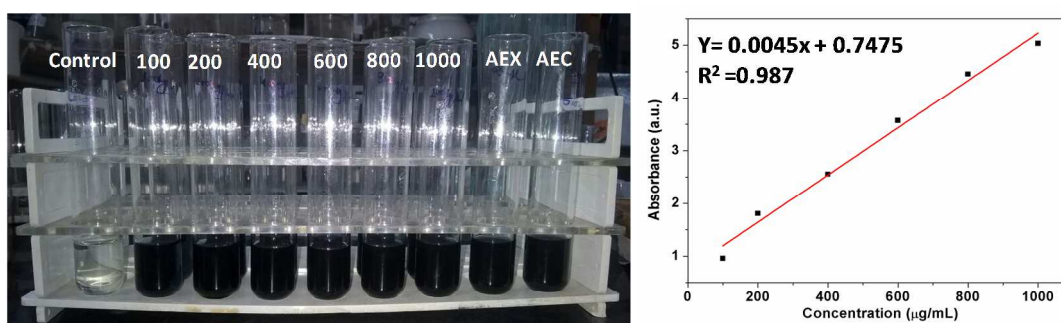

$$TP = \frac{\text{Value of 'x' } \times \text{ Volume used}}{\text{Amount of leaf added } \times \text{ Amount of AEX}}$$

$$TP = \frac{722 \mu\text{g} \times 100 \text{ mL}}{25 \text{ g} \times 1 \text{ mL}}$$

$$TP = 2891 \mu\text{g GAE/g}$$

$$TP = 2.891 \text{ mg GAE/g}$$

**Figure Supporting Information 1.** Change in color of the reaction mixtures including Control, different standard solution of GA, and AEC (A), Calibration curve of standard solutions of GA (B), and calculation of TP (C).

## Biosynthesis

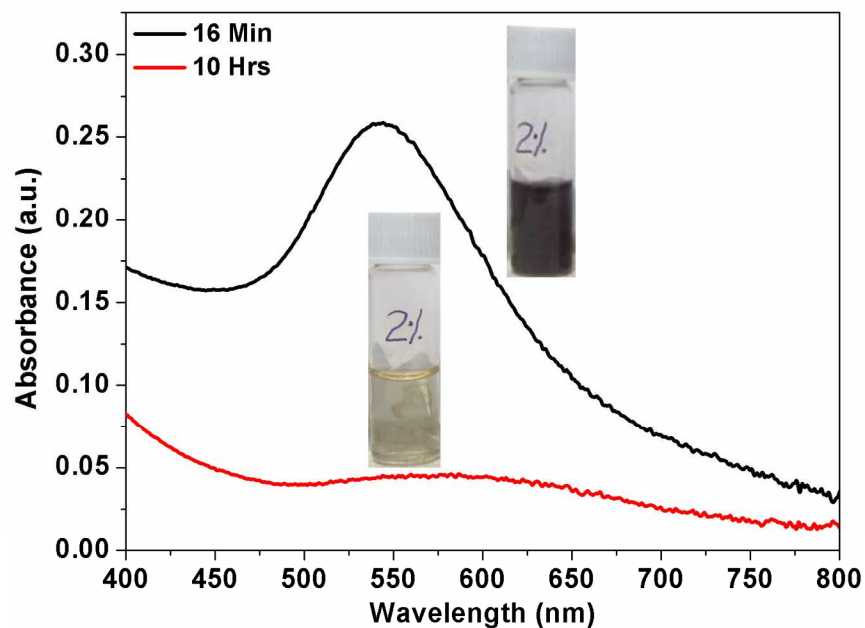

**Figure Supporting Information 2.** UV-vis absorption spectra of AuNPs in sunlight and in dark after 16 min and 10 hrs respectively with respective color change (conditions;  $\text{HAuCl}_4 \cdot x\text{H}_2\text{O}$  conc. 0.8 mM, AEC inoculum dose 2% (v/v)).

## Characterization

### XRD

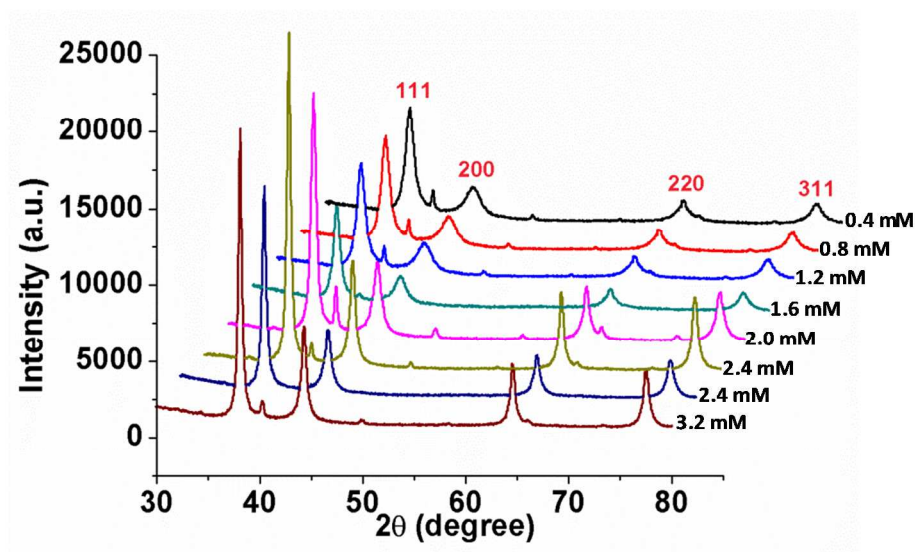

**Figure Supporting Information 3.** X-ray diffraction pattern of AuNPs obtained from different  $\text{H[AuCl}_4\text{]} \cdot x\text{H}_2\text{O}$  concentration (0.4 mM to 3.2 mM).

## Zeta potential

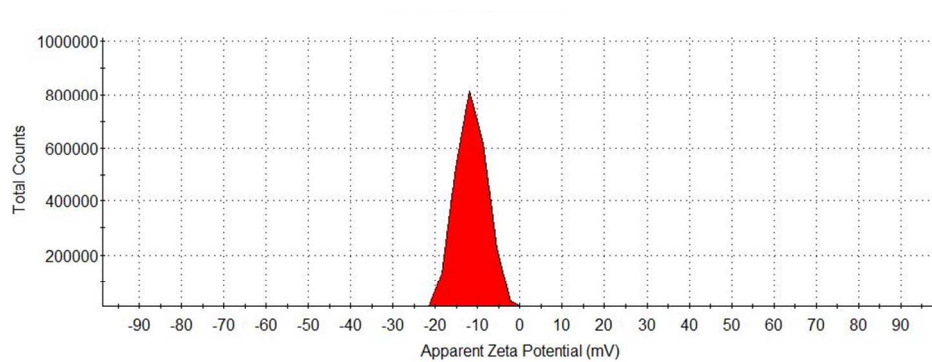

**Figure Supporting Information 4.** Zeta potential showing the negatively charged surface of AuNPs

## Peroxidase-like activity

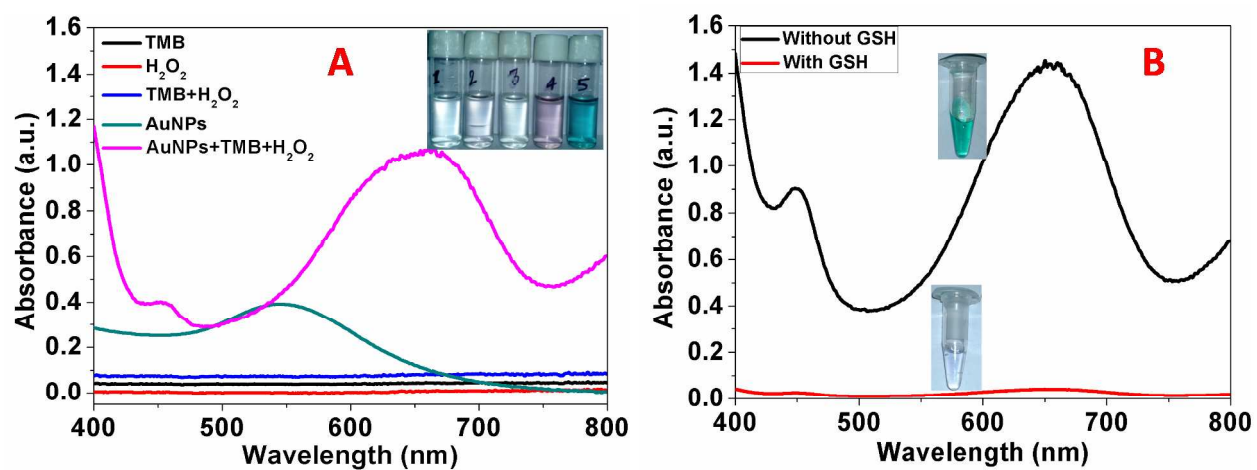

**Figure Supporting Information 5.** UV- visible absorbance spectra of (A) TMB,  $H_2O_2$ , TMB+ $H_2O_2$ , AuNPs, AuNPs+TMB+ $H_2O_2$ , and (B) AuNPs+TMB+ $H_2O_2$  solution in the presence and absence of GSH and their corresponding digital images

### Optimization of pH and temperature

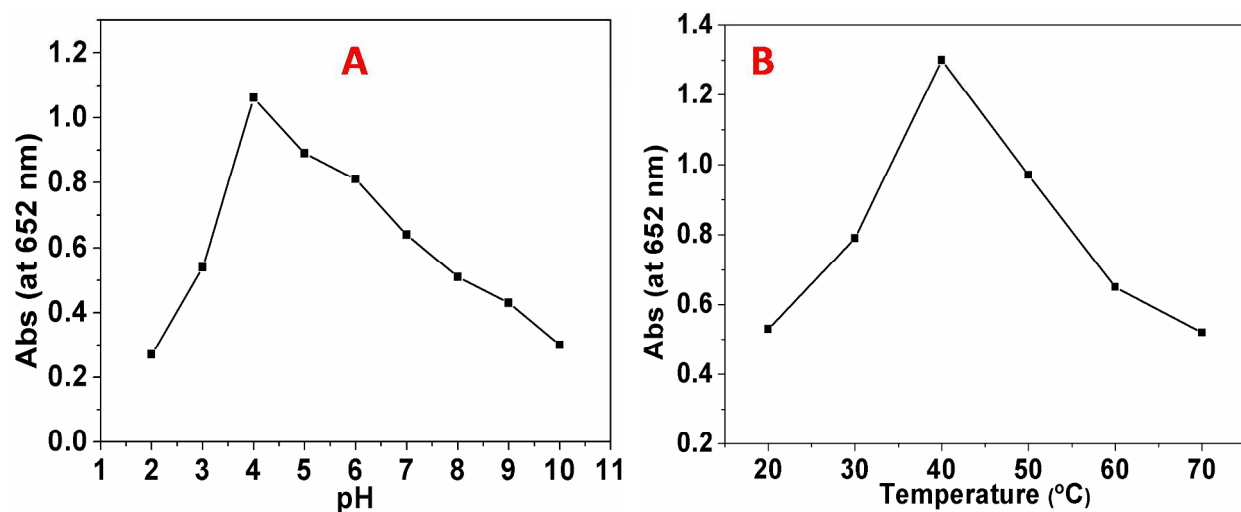

**Figure Supporting Information 6.** Peroxidase like activity of AuNPs at different **(A)** pHs (2 – 10) at 37 °C, and **(B)** temperatures, (20 – 70 °C) at pH 4 using AuNPs (50  $\mu$ L) + TMB (50  $\mu$ L, 1mM) +  $\text{H}_2\text{O}_2$  (50  $\mu$ L, 1 mM) in 0.2 M NaAc buffer solution



## Detection of GSH

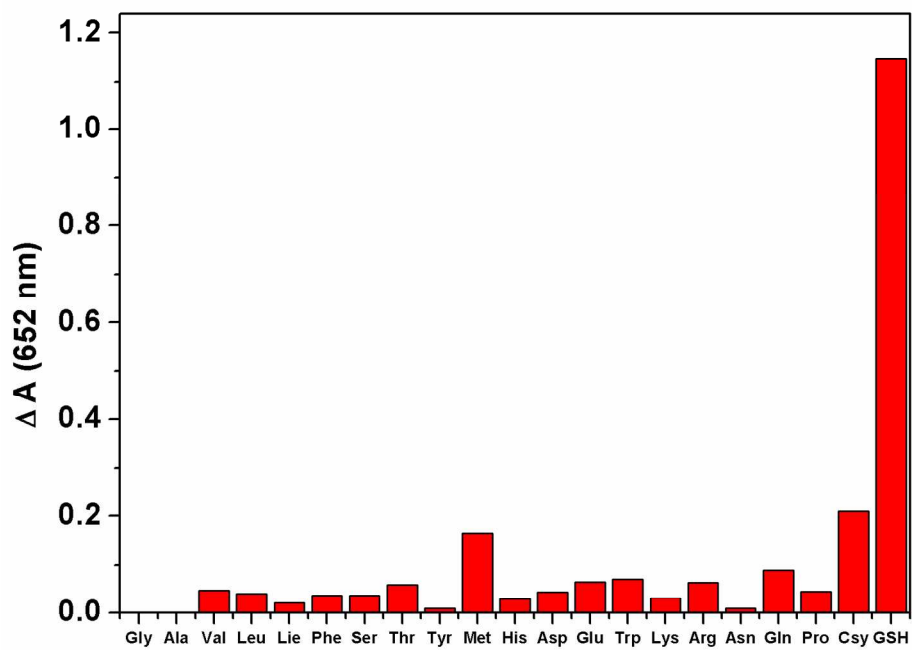

**Figure Supporting Information 7.** Selectivity of the TMB+H<sub>2</sub>O<sub>2</sub>+AuNPs system for the detection of GSH

**Table Supporting Information 1. Comparison table of average size obtained from TEM and XRD analysis**

| S.N. | TEM                          |                   | XRD               |
|------|------------------------------|-------------------|-------------------|
|      | Metal ion concentration (mM) | Average Size (nm) | Average size (nm) |
| 1    | 0.4                          | 5.6               | 7.1               |
| 2    | 0.8                          | 5.7               | 7.4               |
| 3    | 1.2                          | 6.1               | 9.3               |
| 4    | 1.6                          | 8.6               | 10.4              |
| 5    | 2.0                          | 13.2              | 13.4              |
| 6    | 2.4                          | 14.5              | 16.4              |
| 7    | 2.8                          | 17.7              | 20.3              |
| 8    | 3.2                          | 19.4              | 22.2              |
